1 Microfluidic study of effects of flow velocity and nutrient concentration on biofilm  
2 accumulation and adhesive strength in microchannels

3

4 Na Liu,<sup>a#</sup> Tormod Skauge,<sup>a\*</sup> David Landa-Marbán,<sup>b</sup> Beate Hovland,<sup>a</sup> Bente  
5 Thorbjørnsen,<sup>a</sup> Florin Adrain Radu,<sup>b</sup> Bartek Florczyk Vik,<sup>a</sup> Thomas Baumann,<sup>c</sup> Gunhild  
6 Bødtker<sup>a</sup>

7

8 <sup>a</sup>Uni Research, Realfagbygget, Centre for Integrated Petroleum Research (CIPR),  
9 Nygårdsgaten 112, 5008 Norway

10 <sup>b</sup>Department of Mathematics, Faculty of Mathematics and Natural Sciences, University  
11 of Bergen, Allégaten 41, P.O. Box 7803, 5020 Bergen, Norway.

12 <sup>c</sup>Institute of Hydrochemistry, Technische Universität München, Marchioninstr. 17, D-  
13 81377 München, Germany

14

15 Running Head: Biofilm accumulation and adhesive strength

16

17 #Address correspondence to Na Liu, [nali@norceresearch.no](mailto:nali@norceresearch.no).

18 \*Present address: Tormod Skauge, Energy Research Norway, Realfagbygget, Allégaten  
19 41, Bergen 5007, Norway.

20

## 21 **ABSTRACT**

22 Biofilm accumulation in the porous media can cause plugging and change many physical  
23 properties of porous media. Up to now, applications of desired biofilm growth and its

24 subsequent bioplugging have been attempted for various practices. A deeper  
25 understanding of the relative influences of hydrodynamic conditions including flow  
26 velocity and nutrient concentration, on biofilm growth and detachment is necessary to  
27 plan and analyze bioplugging experiments and field trials. The experimental results by  
28 means of microscopic imaging over a T-shape microchannel show that flow velocity and  
29 nutrient concentrations can have significant impacts on biofilm accumulation and  
30 adhesive strength in both flowing and stagnant microchannels. Increase in fluid velocity  
31 could facilitate biofilm growth, but that above a velocity threshold, biofilm detachment  
32 and inhibition of biofilm formation due to high shear stress were observed. High nutrient  
33 concentration prompts the biofilm growth, but was accompanied by a relatively weak  
34 adhesive strength. This research provides an overview of biofilm development in a  
35 hydrodynamic environment for better predicting and modelling the bioplugging  
36 associated with porous system in petroleum industry, hydrogeology, and water  
37 purification.

### 38 **IMPORTANCE**

39 In the recent decade, the use of bacteria has become more and more important in many  
40 applications. Bioplugging caused by bacteria growth in porous media has been explored  
41 as a viable technique for some applications, such as bioremediation, water purification  
42 and microbial enhanced oil recovery (MEOR). In order to control biofilms/biomasses  
43 selectively/directionally plugging in desirable places, the role of hydrodynamic  
44 conditions on biofilm growth and detachment is essential to investigate. Herein, a T-  
45 shape microchannel was prepared to study effects of flow velocity and nutrient  
46 concentration on biofilm accumulation and adhesive strength at pore scale. Our results

47 suggest that flow velocity and nutrient concentration could control biofilm accumulation  
48 in microchannels. The finding helps explain and predict the engineering bioplugging in  
49 porous media, especially for the selective plugging strategy of a MEOR field trial.

## 50 **INTRODUCTION**

51 Biofilm accumulation in the pore space can cause pore plugging, leading to significant  
52 changes in physical properties of porous media, such as the reduction of porosity and  
53 permeability (1-5). The plugging effect might have negative impacts in many industrial  
54 and medical applications because the clogging pores need extra cost to clean and  
55 prevention. However, engineering bioplugging has been explored as a viable technique  
56 for various practices, such as in situ bioremediation (6), soil injection (7), waste treatment  
57 (8, 9), ground water recharge (10) and microbial enhanced oil recovery (11-15). For  
58 example, in MEOR trials biofilm accumulation leads to selective plugging of high  
59 permeability zones, subsequently forcing the diversion of injected fluids towards lower  
60 permeable zones to improve the oil recovery (15, 16). Suthar et al. confirmed the  
61 obtained oil recovery because of bacterial growth and biofilm formation in the sand pack  
62 (17). Karambeigi et al. used two different heterogeneous micromodels to observe  
63 potential of bioplugging of high permeable layers of porous media for improving the  
64 efficiency of water flooding (2). Klueglein et al. investigated the influences of nutrients  
65 concentrations on cell growth and bioplugging potential during a MEOR trial (18). Even  
66 tremendous efforts have been made to improve the understanding of bioplugging, few  
67 works concern biofilm studies of biofilm growth and detachment mechanisms  
68 accompanying the bioplugging process.

69 Bioplugging in porous media results from the accumulation of bacterial cells, production  
70 of extracellular polymeric substances (EPSs) in the pore space. Due to physicochemical  
71 properties of EPSs, biofilms can behave as viscous liquids to resist the flow-induced  
72 shear stress, and substantially plug the pore (19-22). Engineering bioplugging is a process  
73 used to control biofilms selectively and substantially plugging in desired places (6, 23,  
74 24). Therefore, knowledge on mechanisms of biofilm development and its adhesive  
75 strength with solids surface is vitally important to plan and predict the engineering  
76 bioplugging process. It was found that biofilm growth and detachment could be  
77 significantly influenced by varying hydrodynamic conditions on the surrounding  
78 environment (19, 20, 25). Biofilm growth and detachment rates could both increase with  
79 fluid velocity, as the increased mass transfer facilitating nutrients supply for bacteria  
80 growth, while the increased shear force in turn causing detachment (19, 21, 26, 27).  
81 There is a consensus that biofilm growth rate increases with nutrients concentration,  
82 while nutrient starvation results in biofilm detachment (28-30). Nonetheless, knowledge  
83 on bioplugging must be depicted by examining a correlation between biofilm  
84 accumulations and its adhesive strength and hydrodynamic conditions like flow velocity  
85 and nutrient concentration, to improve understanding and hence ability to control  
86 bioplugging in fluid flooded porous systems.

87 Traditionally quiescent experiments for biofilm research were normally carried on  
88 homogeneous physical conditions, which lack environmental complexities for accurately  
89 determining the dynamic changes occurring during biofilm development (31). The advent  
90 of new technologies, specially microfluidics, have attracted a rapidly growing interest to  
91 emulate biological phenomena by addressing unprecedented control over the flow

92 conditions, providing identical and reproducible culture conditions, as well as real-time  
93 observation (26, 30, 32, 33). Indeed, microfluidics has been used for observing biofilm  
94 formation under various fundamental and applied researches, e.g. wastewater treatment  
95 (34) and medical fields (20, 35). Herein, we used a T-shape microfluidic device equipped  
96 with a microscope to study the biofilm accumulation and adhesive strength as responds to  
97 various flow velocities and nutrient concentrations in the microchannel.

## 98 RESULTS

99 **Effects of flow velocity on biofilm accumulation and adhesive strength.** Biofilms  
100 development in microchannels were measured by varying injecting flowrates of 10mM  
101 pyruvate (1.0 N) from 0.2  $\mu\text{l}/\text{min}$  to 0.5  $\mu\text{l}/\text{min}$ . After 6 days, the shear rate was steadily  
102 increased to 500.00  $\text{s}^{-1}$  to test the adhesive strength of biofilm attached on the solid  
103 surface. The corresponding flow velocity, Peclet number, Reynolds number and shear  
104 rate at each flowrate in Channel 1 are listed in **Table 1**. The accumulation of biofilms at  
105 different velocities was observed and registered as function of time by use of microscope.

106 **TABLE 1.** Table of basic flow parameters at various flowrates in this study.

| Flowrate,<br>$\mu\text{l}/\text{min}$ | Water velocity,<br>$\text{mm}/\text{s}$ | Peclet number,<br>Pe | Reynolds<br>number, Re | Shear rate,<br>$\text{s}^{-1}$ |
|---------------------------------------|-----------------------------------------|----------------------|------------------------|--------------------------------|
| 0.2                                   | 1.66                                    | 97.64                | 0.17                   | 83.33                          |
| 0.3                                   | 2.50                                    | 147.06               | 0.25                   | 125.00                         |
| 0.4                                   | 3.33                                    | 195.88               | 0.33                   | 166.67                         |
| 0.5                                   | 4.17                                    | 245.30               | 0.42                   | 208.33                         |

1.2                      10.00                      705.88                      1.00                      500.00

---

107

108 **Biofilm morphologies.** Images of biofilms development in two microchannels at various  
109 flow velocities are shown in **Fig. 2**. After inoculation, the initial attached biofilms at low  
110 velocities (1.66 and 2.50 mm/s) became irreversible and developed towards different  
111 structures along the nutrients flow. Biofilms at 1.66 mm/s tends to be approximately  
112 circular shape and has a larger coverage area, while biofilms at 2.50 mm/s show  
113 appearance of thin plate structures. There is no clear biofilm formation in Channel 1 at  
114 high velocities. On the contrary, biofilms formed at Channel 2 at 3.33 mm/s led to a  
115 larger clusters compared with low rates. There was no biofilm growth in either channel at  
116 the highest flow velocity of 4.17 mm/s.

117 After 6 days of biofilm culturing, the shear rate steadily increased to 500.00 s<sup>-1</sup> to test the  
118 adhesive strength between biofilms and solid surfaces. As shown in the right column  
119 images of **Fig. 2**, biofilms in Channel 1 at 1.66 mm/s became elongated in the flowing  
120 direction to form filamentous “streamers” when the shear force acting on biofilms  
121 increasing with shear rate; while there was no clear shape difference on biofilms growth  
122 at higher velocities in Channel 1 and Channel 2.

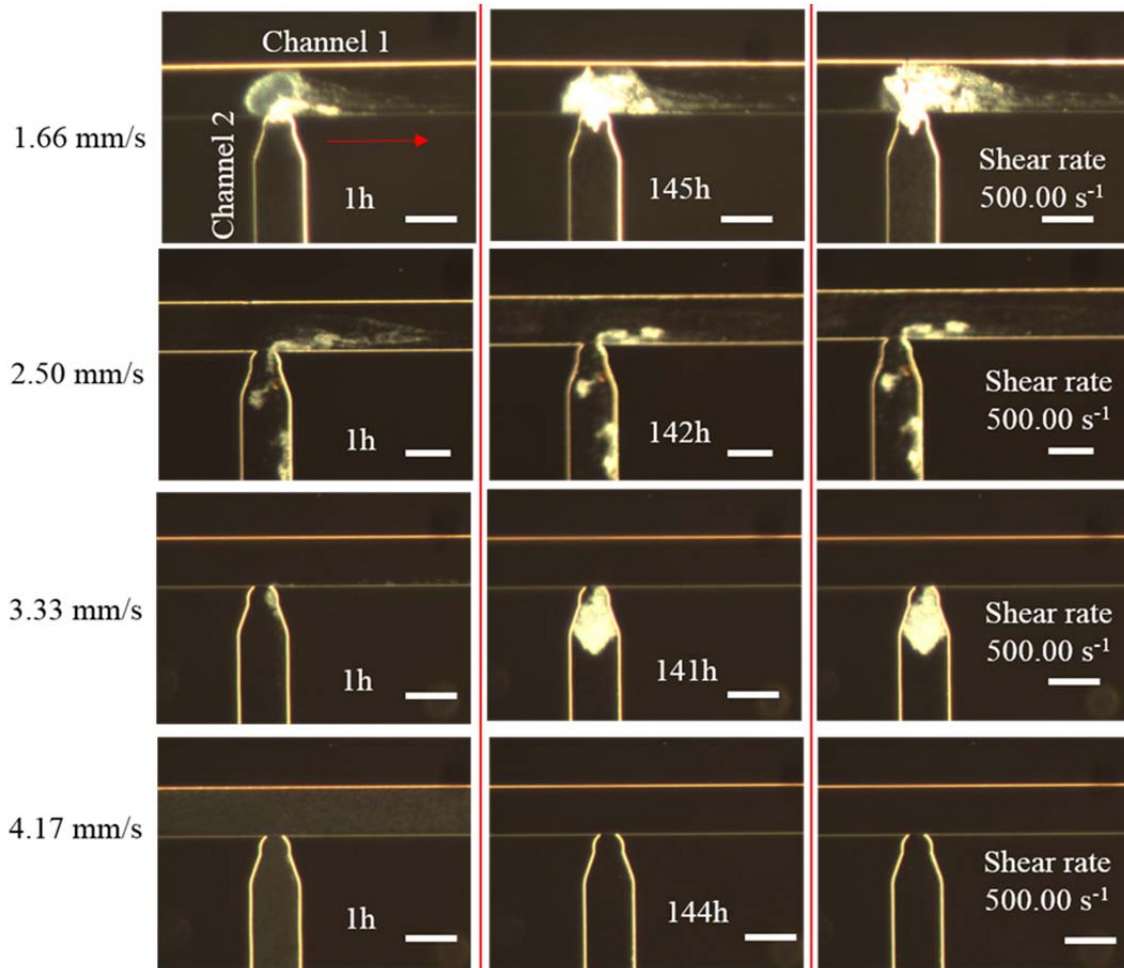

123

124 **FIG 2.** Optical images of biofilm growth in both microchannels at 1.0 N and various  
125 velocities. Images in the left column were taken after injecting nutrients for 1 h. The  
126 middle column shows images of biofilm growth for around 6 days. The right column lists  
127 images of biofilm detachment by increasing shear rate to 500.00 s<sup>-1</sup>. Nutrients flow from  
128 right to left in the upper channel. Scale bars indicate 100 μm.

129 **Biofilm accumulation in the flowing and no-flowing channels.** Biofilm coverages as a  
130 function of time for different flow velocities in two microchannels are listed in **Fig. 3**. In  
131 the early of injection, the coverage of biofilms decreased as the flow shear stress snapped  
132 off some of weak initial attachments. After an active time when the left biofilms turned  
133 into irreversibly attached and new biofilms formed, biofilms coverage increased over

134 time. As the velocity increased from 1.66 to 4.17 mm/s, biofilm coverage gradually  
135 decreased. **Fig. 3 (b)** plots biofilm coverage in the no flowing channel (Channel 2) as a  
136 function of time in each run. Biofilm coverages at all velocities increased over time,  
137 while the optimum velocity is 3.33 mm/s due to its exceptionally high accumulation rate.

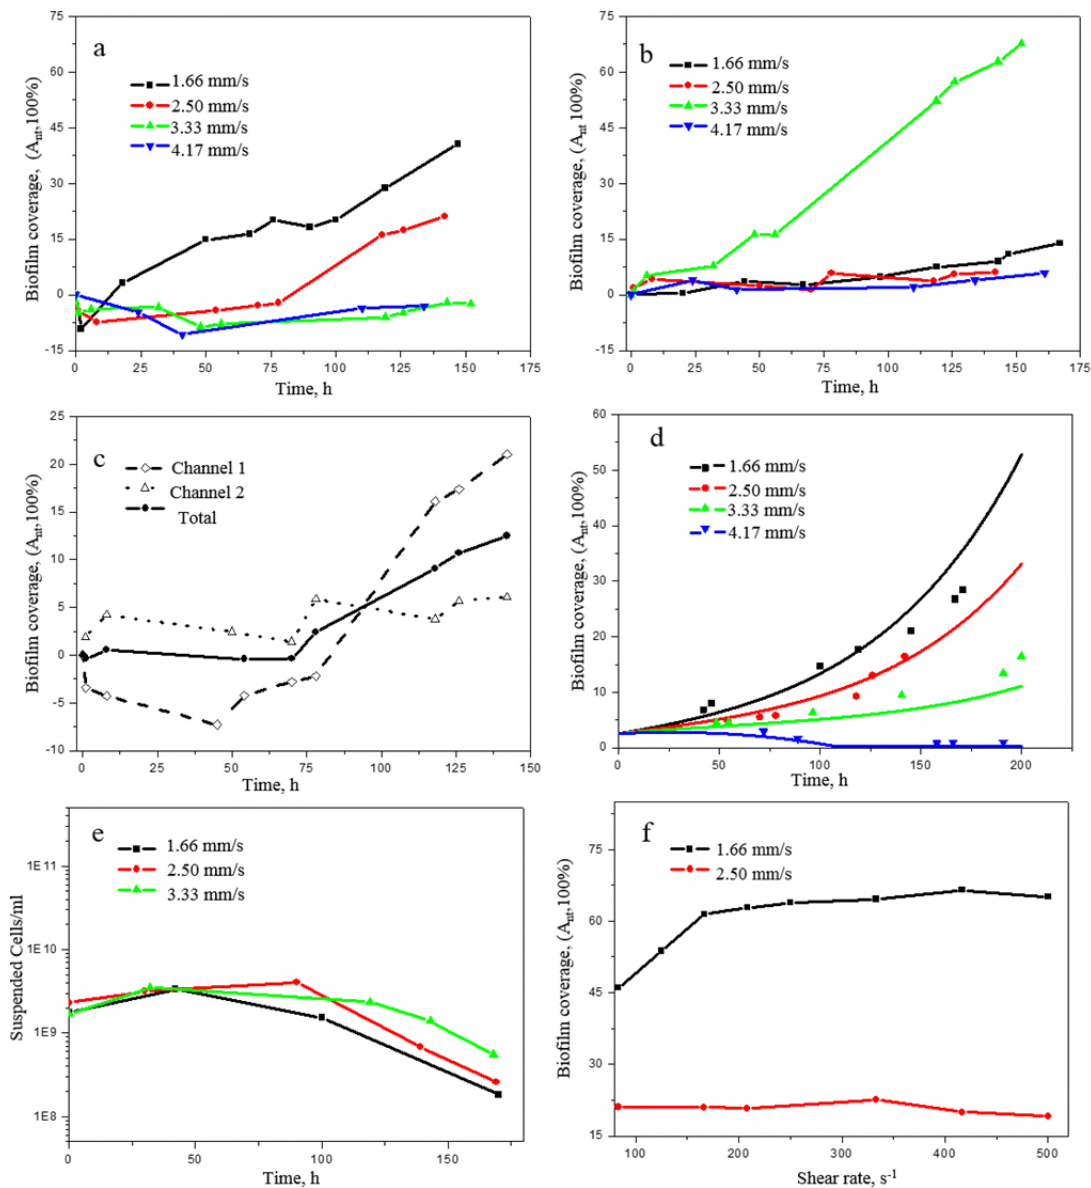

138

139 **FIG 3.** (a) Biofilm coverage over time in Channel 1 at various velocities; (b) Biofilm

140 coverage over time in Channel 2 at different velocities; (c) Comparison of biofilm



141 accumulation in both channels at 2.50 mm/s; (d) Experimental data and numerical  
142 simulations of biofilm coverage in both channels at various velocities; (e) Number of  
143 released cells as a function of biofilm culture time at various velocities; (f) Biofilm  
144 coverage in Channel 1 as response to the increasing shear rate after culturing biofilms at  
145 the velocities of 1.66 and 2.50 mm/s for 6 days.

146 Comparing biofilms growth at 2.50 mm/s in Channel 1 and Channel 2 in **Fig. 3 (c)**,  
147 biofilm coverage in Channel 2 increased with time initially but after 75 hours reached to  
148 a plateau value. This leveling off behavior was not observed in Channel 1. The stable  
149 coverage obtained in Channel 2 might be attributed to that cells in the biofilm cannot  
150 obtain sufficient essential sources of nutrients for new biofilm formation as biomass  
151 increased in the growing biofilm community. However, the continuous nutrients supply  
152 in Channel 1 delays this plateau. **Fig. 3 (d)** compares the experimental data with the  
153 mathematical model of biofilm coverages in both microchannels at various velocities.  
154 The numerical data is from D. L. Marbán' work ( D. L. Marbán, submitted for  
155 publication) , and shows that our experiment data is well fit with the numerical  
156 simulation.

157 **Biofilm adhensive strenth test.** In the biofilm culturing time, the number of released  
158 bacterial cells in the effluent at various velocities is shown in **Fig. 3 (e)**. The cells number  
159 increased in the first two days after inoculation, which mainly contributes to that the  
160 reversible adhered bacteria after inoculation were driven out the microchannel by the  
161 nutrients flow shear stress. After 48 h, the biofilm-dispersal cells decreased, which  
162 corresponds to the increase of biofilm coverage over time in **Fig. 3 (a)**, exhibiting that  
163 more bacteria involved into biofilm growth. Moreover, the increase of cell densities with

164 flow velocity may indicate a higher detachment rate and a possible higher planktonic  
165 growth with an increase of shear stress.  
166 After 6 days of biofilm culturing, biofilm coverages in Channel 1 as responds to the  
167 increasing shear rate from  $83.33 \text{ s}^{-1}$  and  $125.00 \text{ s}^{-1}$  up to  $500.00 \text{ s}^{-1}$  are shown in **Fig. 3 (f)**.  
168 Biofilm accumulation at  $1.66 \text{ mm/s}$  increased when increasing nutrients shear rate to  
169  $166.67 \text{ s}^{-1}$ , suggesting that the increasing shear stress facilitates the diffusion of nutrients  
170 inside of biofilm and promotes its growth. Continuely increasing the shear rate, the  
171 growth trend slowed down; until up to  $500 \text{ s}^{-1}$ , biofilm coverage slightly decreased, which  
172 dominates that the high shear rate brought about biofilm detachment. Simillar results are  
173 obtained at biofilm growth at  $2.50 \text{ mm/s}$ , which no large degree of detachment occurred  
174 as responds to low flow shear rates until up to  $500 \text{ s}^{-1}$ .

175 **Effect of nutrient concentration on biofilm accumulation and adhesive strength.** To  
176 assess the influence of nutrient conditions on biofilm accumulation and adhesive strength,  
177 biofilms were cultured at different nutrient concentrations. The baseline,  $1.0 \text{ N}$ , was  $10$   
178  $\text{mM}$  pyruvate in the growth medium and variations of two times ( $2.0 \text{ N}$ ), half ( $0.5 \text{ N}$ ) and  
179 one tenth ( $0.1 \text{ N}$ ) of the baseline concentration were applied. Injections were performed  
180 at a constant velocity of  $1.66 \text{ mm/s}$  from Channel 1 for approximately 7 days, and  
181 followed by a biofilm strength test by steadily increasing shear rate. The images are  
182 shown in **Fig. 4**.

183 **Biofilm morphologies.** As shown in **Fig. 4**, biofilm in Channel 1 with the highest  
184 concentration  $2.0 \text{ N}$  has a long, thick but loose structure, which is highly sensitive to the  
185 variation of shear stress. After  $122 \text{ h}$ , the formed biofilm was dispersed from the deep of  
186 the matrix, leaving behind a few attached biofilm spots to regrow. At nutrients input  $1.0$

187 N and 0.5 N, biofilm became denser and compacted, and the influence of shear stress  
188 reduced. When decreasing the nutrient concentration to 0.1 N, there was no clear biofilm  
189 growth occurred in the nutrient continuous flowing channel.

190 The biofilm in Channel 2 at nutrient inputs of 2.0 N and 0.5 N had larger coverages than  
191 other concentrations, which the former confirms that high nutrient concentrations lead to  
192 a fast biofilm growth and the later might be related to the large initial attachments  
193 containing more biomasses for biofilm growth. It is noticed that there is barely new  
194 biofilm formation at both channels at 0.1 N, which shows that the lowest nutrient input  
195 significantly limited biofilm growth and formation.

196 As responding to the increasing shear rate, biofilm with low density and loose structure at  
197 2.0 N, was highly sensitive to the variation of shear stress, which detached from the  
198 substrates at the shear rate of  $83.33 \text{ s}^{-1}$ . Biofilm growth at 0.5 N reacted as same as that at  
199 1.0 N when the increasing shear rate acted on biofilms, and became elongated in the  
200 flowing direction.

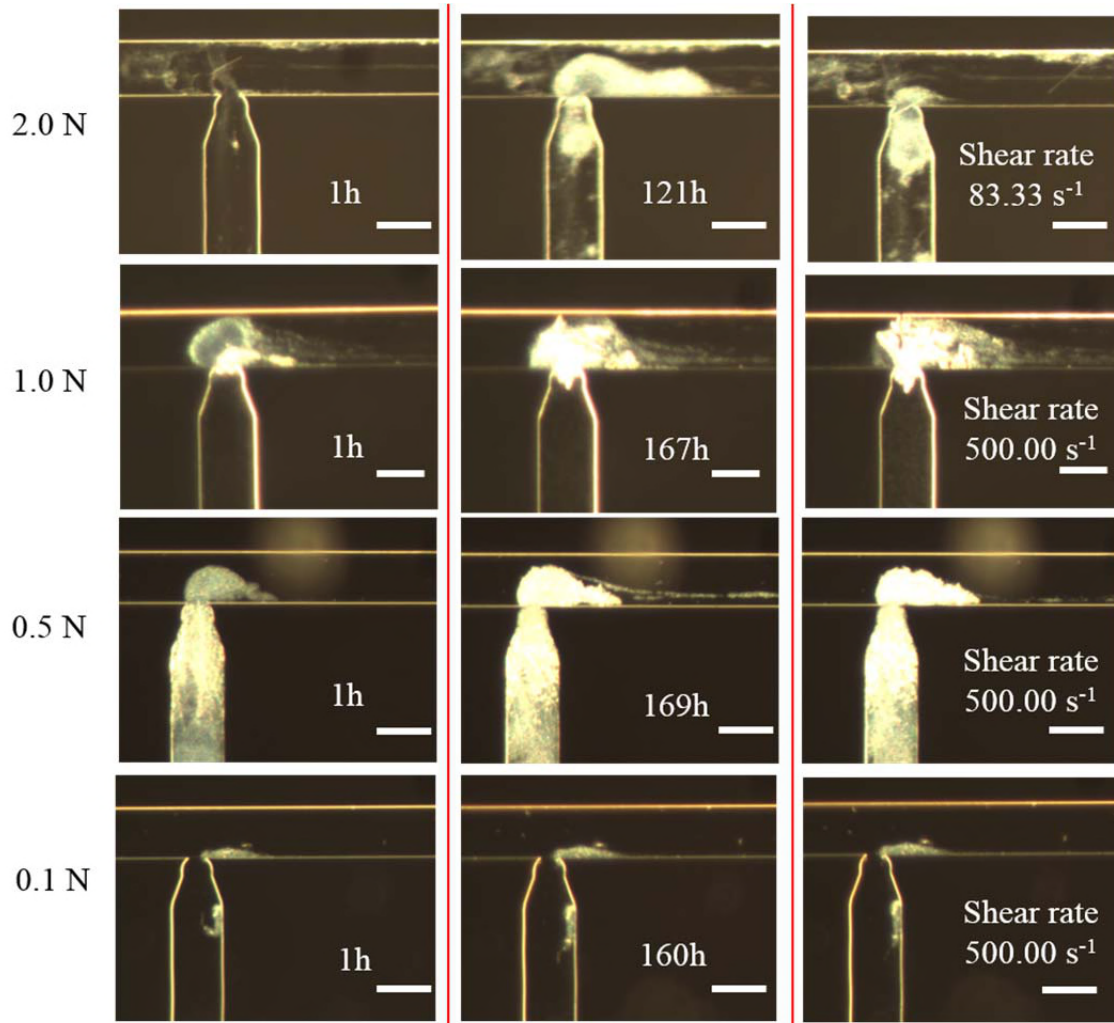

201

202 **FIG 4.** Optical images of biofilm growth over time at various nutrient concentrations, 2.0  
203 N, 1.0 N, 0.5 N, and 0.1 N, respectively. Images in the left column were taken after  
204 injecting nutrients for 1 h. The middle column shows images of biofilm growth for  
205 around 7 days. The right column lists images of biofilm detachment by increasing shear  
206 rate to 500.00 s<sup>-1</sup>. Nutrients flow from right to left in the upper channel. Scale bars  
207 indicate 100 μm.

208 **Biofilm accumulation in the flowing and no-flowing channels.** Biofilm coverages as a  
209 function of time for different nutrient concentrations in two microchannels are shown

210 **Fig. 5.** As shown in **Fig. 5 (a)**, in Channel 1, biofilm growth at a high nutrient

211 concentration of 2.0 N has a much faster accumulation rate in the first 5 days, but rapidly  
212 decreased when most parts of biofilm matrix were detached from the substrate. At the  
213 medium nutrient feeding zones, biofilm accumulation at 0.5 N is higher than that of 1.0 N  
214 in the first 3 days, and reached a plateau value after that, which was not observed for 1.0  
215 N. When decreasing the nutrient concentration to 0.1 N, there was no clear biofilm  
216 formation in both channels. Therefore, the lowest nutrient concentration (0.1 N) could not  
217 provide environment for biofilm growth. In this study, the limiting nutrient concentration  
218 for biofilm growth appears to be between 0.1 and 0.5 times N.

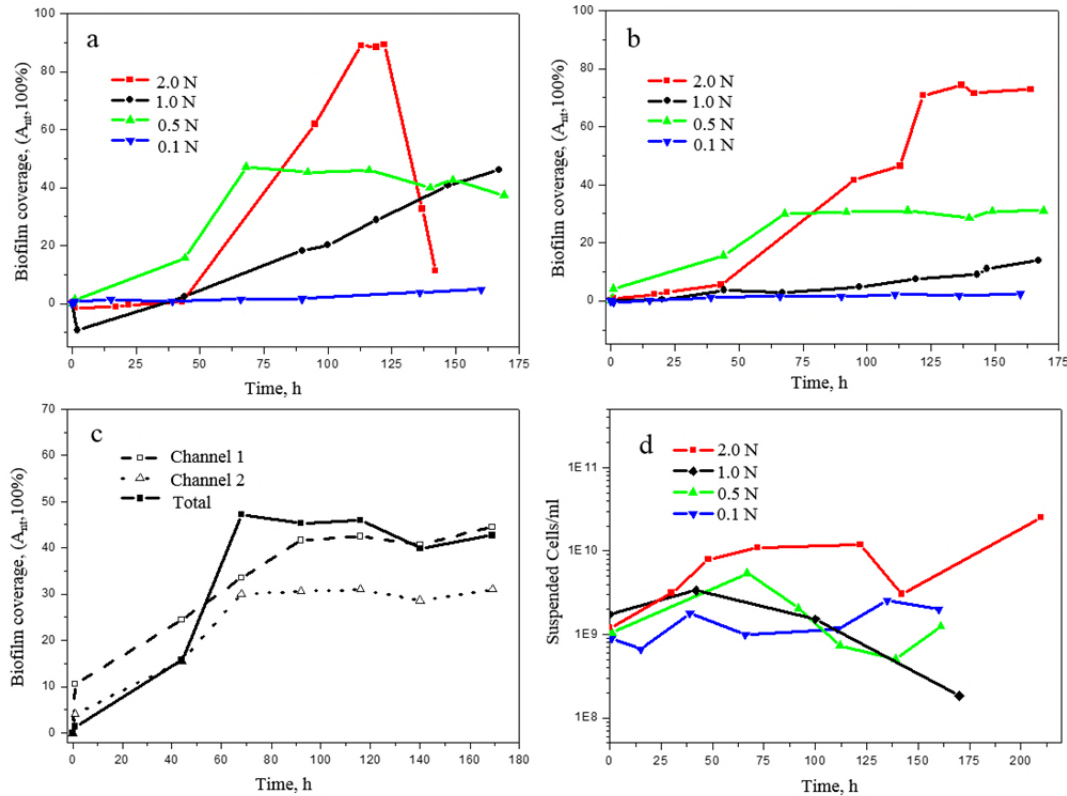

219

220 **FIG 5.** (a) Biofilm coverage over time in Channel 1 at different nutrient concentrations;

221 (b) Biofilm coverage over time in Channel 2 at different nutrient concentrations; (c)

222 Comparison of biofilm coverage in both channels at 0.5 N and 1.66 mm/s; (d) Cell

223 number of effluents at various nutrient concentrations at the flow velocity of 1.66 mm/s.

224 As shown in **Fig. 5 (b)**, biofilm accumulation in Channel 2 is influenced by nutrient  
225 concentrations. Biofilm formation at 2.0 N has larger coverage than other cases,  
226 indicating that high nutrients loading in Channel 1 leads to an increase in biofilm growth  
227 in Channel 2. In addition, biofilm growth in a no flow channel reached to a stable plateau  
228 at the later stage of its development. The time to reach the stable plateau at 2.0 N was  
229 later than 0.5 N, suggesting that high nutrient concentration leads to a decrease in the  
230 time taken to reach the stable plateau in a no flow system. **Fig. 5 (c)** shows that biofilm  
231 coverage obtained stable plateaus at 0.5 N in both channels. The time to reach the plateau  
232 in Channel 1 was later than that in Channel 2, indicating that flow shear rate can facilitate  
233 mass transfer and lead an increase in the time taken to reach the stable state.

234 **Biofilm adhesive strength test.** **Fig. 5 (d)** presents the result of cell number in the  
235 effluent at different nutrient concentrations. The cell number at 2.0 N is higher than other  
236 nutrient concentrations. The released cell numbers are relatively in the same level at 0.5  
237 N and 1.0 N in the beginning. However, when biofilm stopped growing at 0.5 N, the  
238 detached cells increased over time, suggesting that the mature biofilm would disperse  
239 more planktonic cells into the bulk liquid (26). At the limited nutrient supply (0.1 N), the  
240 released cell number in the effluent was stable and no biofilm accumulated in the  
241 channel, indicating that bacteria at limited nutrient loading prefer to live in the planktonic  
242 style instead of biofilm style (36, 37).

243 It is noticed that biofilm growth at 2.0 N had a weak adhesive strength with substrates,  
244 because cells deep in the biofilm were dispersed from the interior of the biofilm matrix  
245 causing large degree of detachment. We observed this dispersion occurring at nutrient  
246 concentration of 2.0 N and flow velocities of 1.66 and 2.50 mm/s (**Fig. 6 (a)**). Firstly, a

247 central region in the biofilm matrix (shows in red circles of images in **Fig. 6 (a)**), become  
248 visible and light, which has demonstrated the pre-dispersion behavior (22). Eventually,  
249 microcolonies within the regions migrated into the bulk liquid, leading to huge biofilm  
250 detachments. Biofilms were observed to undergo growth and dispersion simultaneously  
251 at high nutrient concentrations (**Fig. 6 (b)**). The coverage area increased steadily after an  
252 active time, but decreased when biofilms were detached from the substrate and increased  
253 again while the left biofilm spots regrew. As biofilm growth at high rate at 2.0 N, cells  
254 trapped deeper in the biofilm matrix may have difficulties obtaining essential sources of  
255 energy or nutrients. In addition, waste products and toxins can accumulate fast in the  
256 biofilm community to reach toxic levels, threatening cells survival. Thus,  
257 microorganisms within the biofilm release from the matrix to resettle at a new location.



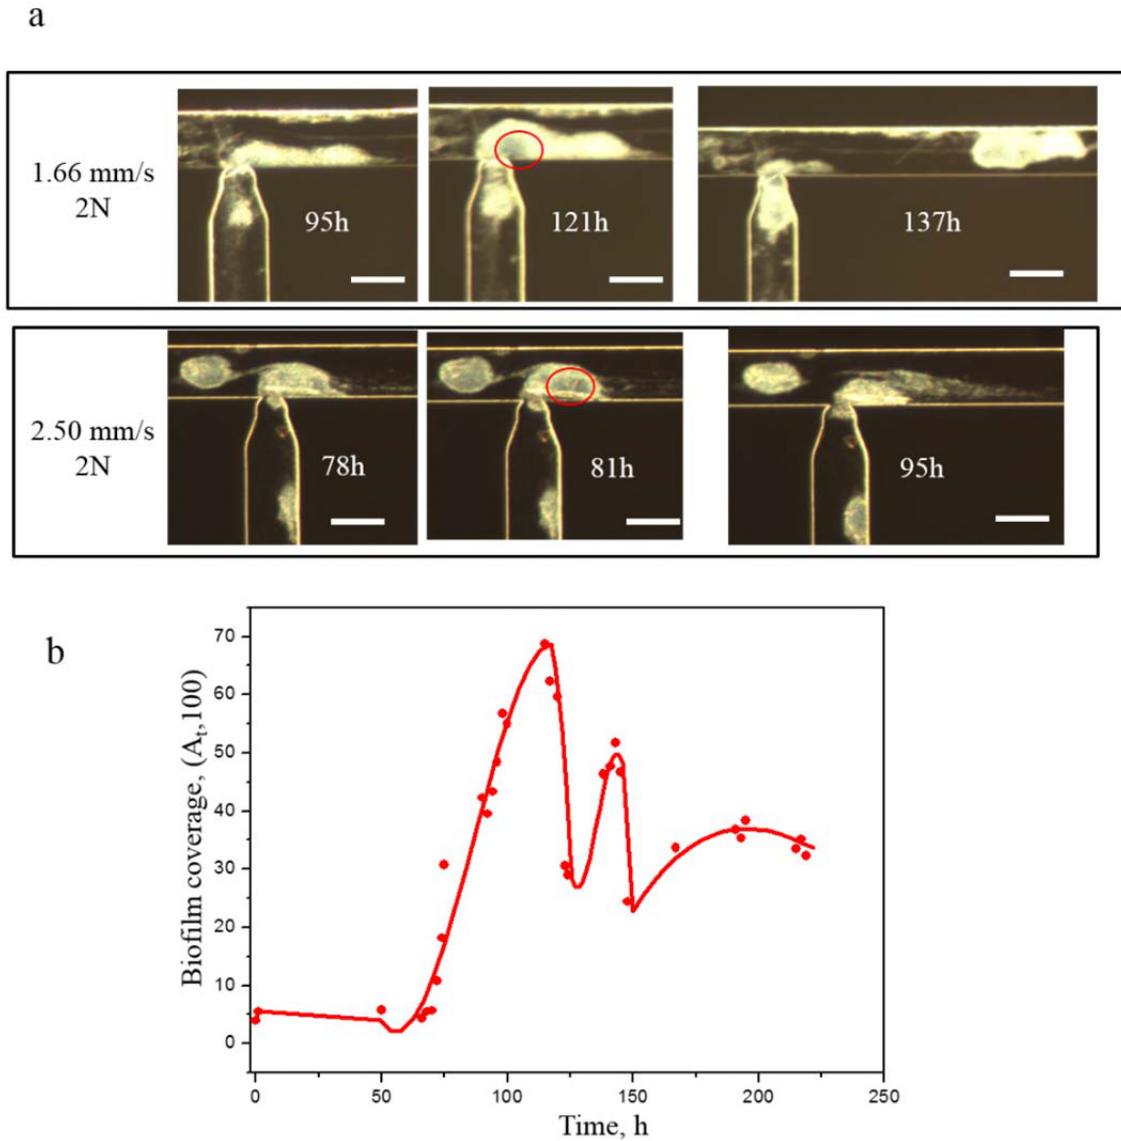

258

259 **FIG 6.** (a) Images of biofilm growth following dispersion events at high nutrient

260 concentration of 2.0 N and flow velocities at 1.66 and 2.50 mm/s. (b) Biofilm

261 accumulation at 1.66 mm/s and nutrient concentration of 2.0 N.

## 262 **DISCUSSION**

263 **Biofilm morphologies.** The observations on biofilm morphologies at each run

264 demonstrate that flow velocity and nutrients concentration have direct effects on biofilm

265 morphology. Biofilms formed in Channel 1 reveal the influence of flow shear stress drag.



266 The shapes of biofilm clusters became compacted and progressively elongated along the  
267 flow direction with the increase of flow velocity (**Fig. 2**). While biofilms formed at the  
268 high nutrient concentration have long, thick but loose structures, and became denser and  
269 compacted with the decrease of nutrient loading (**Fig. 4**). Similar results have been  
270 reported in previous work (21).

271 Biofilm growth in Channel 2 is highly dependent on the diffusion of nutrients in Channel  
272 1. As the former bacteria injection path, most parts of Channel 2 were full of biomasses  
273 without fluid shear forces. Only the void in the nozzle connecting with Channel 1 could  
274 act as the transport channel supplying nutrients for biofilm growth. Biofilms at the high  
275 shear rate of  $166.67 \text{ s}^{-1}$  and 2.0 N led to larger clusters compared with others, indicating  
276 that shear rate and nutrient concentration in Channel 1 determined the flux of nutrients  
277 transport to Channel 2.

278 It is noticed that there was no biofilm growth in either channel at the highest flow  
279 velocity of 4.17 mm/s and lowest nutrients concentrations of 0.1 N, suggesting that the  
280 high shear forces and limited nutrients loading may prevent biofilm formation, which is  
281 in agreement with industrial applications where the formation of biofilm is prevented by  
282 high velocity flooding (36).

283 **Biofilm accumulation in the microchannel.** In this study, we set the initial biofilm  
284 coverage after inoculation to zero, and plot biofilm net coverage  $A_{nt}$ , by subtracting initial  
285 attachment to analysis biofilm accumulation. As shown in **Fig. 3 (a)** and **Fig. 5 (a)**, the  
286 coverages of biofilm are under zero in Channel 1 in the early stage of injection, which  
287 demonstrates that the shear stress caused by nutrients flowing leads to snap-off of weak  
288 initial attachments. When the remained biofilms became irreversibly attached, they

289 behaved as nuclei for new bacteria/biofilm growth, resulting in the increase of biofilm  
290 coverage. Biofilm accumulation in the flowing microchannel (Channel 1) is highly  
291 related with flow velocities through two important factors, mass transfer and shear stress  
292 (19, 27). As shown in **Table 1**, the Reynolds numbers in Channel 1 were very low (from  
293 0.17 to 0.42), while the mass transfer Peclet number were extremely high (from 97.64 to  
294 245.30), which suggests that mass transfer in the microchannel was dominated by  
295 convective actions and has negligible diffusion (38). Thereby, the diffusion of nutrients  
296 from bulk to biofilms rarely increased when increasing the flow velocity, while the shear  
297 stress caused by water flow increased linearly. The accumulation of biofilm, which is  
298 equal to its growth rate minus detachment rate, decreased with increasing flow velocities  
299 when the shear stress induced detachment rate exceed growth rate. Thereby, the optimum  
300 flow velocity for biofilms growth in the flow microchannel is the lowest velocity of 1.66  
301 mm/s in this work.

302 The effect of nutrient concentration on biofilm accumulation in Channel 1 is a non-linear  
303 relationship. The observations at 0.5 N and 1.0 N implies that, in a range of concentration  
304 of nutrient, the biofilm growth rate is independent of the nutrient concentration in the  
305 beginning of biofilm growth (29); as biofilm growing in size, biomass demand is rising  
306 steadily, thereby the nutrient concentration determinates the growth rate in the later stage  
307 of biofilm development.

308 Biofilm accumulation in Channel 2 increased with shear rate and nutrient concentration  
309 in Channel 1 monotonically. Due to in absence of shear stress, biofilm growth in Channel  
310 2 depends on the nutrient diffusive flux from Channel 1, which increases with the flow  
311 velocity and nutrient concentration. Therefore, for a confined no flowing system, biofilm

312 accumulation rate is highly related to the nutrients availability, while the flow shear rate  
313 facilitates mass transfer, leading to an increase in biofilm accumulation. These  
314 observations are in correspondence with previous works (20, 21, 37).  
315 The results indicates that for porous systems, like oil reservoirs, biofilm could develop  
316 not only in the main water flow paths, but also in dead ends and less flooded areas.  
317 Therefore, optimized nutrient flow velocity and nutrient concentration ensures sufficient  
318 nutrients supplying rate with moderate shear stress in the microchannel, resulting in  
319 biofilm accumulation in both flowing and non-flow regions.

320 **Biofilm adhesive strength with the glass surface.** Since only the nutrients solution was  
321 injected through Channel 1 after bacterial inoculation, the suspended cells in the effluent  
322 can be interpreted as the detachment of biofilms which dispersed their planktonic cells in  
323 the bulk growth medium. During exposure to stress, including shear stress and nutrient  
324 starvation, cells dispersed from biofilms go into the planktonic growth phase (39, 40). In  
325 this study, we observed that the biofilm-dispersal cells increased with flow velocity due  
326 to the shear stress induced detachment; nutrient starvation was also a trigger for biofilm  
327 dispersal. In addition to poor nutrient loading, biofilms culturing at the high nutrient  
328 concentration (2.0 N in this study) could also result in biofilm dispersal in the deep of  
329 biofilm matrix, which is mainly because that cells trapped deeper in the biofilm matrix  
330 may have difficulties obtaining essential sources of energy or nutrients. In a flowing  
331 system, biofilm dispersal is beneficial to spawn novel biofilm development cycles at new  
332 locations. Therefore, biofilm dispersal can potentially be used to control bioplugging in  
333 the further places of porous media.

334 In contrast to the planktonic mode, biofilm in a self-generated matrix can behave as  
335 viscous liquids to resist the flow shear stress and prevent from detachment from the  
336 attached solid surface. The results from biofilm adhesive strength test have demonstrated  
337 that biofilms growing at medium nutrient concentrations (0.5 N and 1.0 N) could resist  
338 the flow-induced shear stress. Compared to the large detachment at the initial stage, it  
339 suggests that the adhesive strength between biofilms and adhesive surface became  
340 stronger under shear (22, 41, 42). However, biofilm growth at high nutrient concentration  
341 (2.0 N) forms a loose structure with a high accumulation rate but a weak adhesive  
342 strength with substrates, which is easily detached by fluid shear.

343 **In conclusion**, this work demonstrates that flow velocity and nutrient concentrations can  
344 have significant impacts on biofilm development in both flowing and stagnant  
345 microchannels. Negligible biofilm formation at the relatively high flow velocity of 4.17  
346 mm/s and low nutrient concentration of 0.1 N suggests that there is a ‘no/low growth  
347 region’, where high shear forces lead to biofilm detachment and nutrient concentration is  
348 below the minimum required for biofilm formation. This is supported by the earlier work  
349 (21). At the conditions investigated in this work, a strong plugging effect in the flowing  
350 microchannel was obtained at the relatively low flow velocity of 1.66 mm/s and the  
351 medium nutrient concentration of 1.0 N (10 mM substrate), which has a relative fast  
352 biofilms accumulation rate and a strong adhesion force to resist increase in the flow-  
353 induced shear. This research gives new insight to the relative influences of flow velocity  
354 and nutrient concentration on biofilms development at pore scale. This may aid  
355 evaluations of bioplugging in porous systems such as for oil and ground water reservoirs.  
356 As potential permeability reducers in oil reservoirs, biofilm accumulation in porous

357 media needs to be controlled by flow velocity and nutrient availability. Optimized  
358 nutrient flow velocity and concentration ensures sufficient nutrients supplying rate with  
359 moderate shear stress in the microchannel, resulting in biofilm accumulation in both  
360 flowing and non-flow regions. However, too high stress may prevent biofilm formation  
361 and removal of adhered biofilms in the porous media. High nutrient concentration is  
362 beneficial for biofilm growth, but leads to a weak biofilm adhesive strength, which is  
363 easily detached by flow shear from the pores.

## 364 MATERIALS AND METHODS

365 **Bacteria and fluids.** The bacteria used in the study was: *Thalassospira strain A216101*, a  
366 facultative anaerobic, nitrate-reducing bacteria (NRB), capable of growing under both  
367 aerobic and anaerobic conditions. It is able to grow on fatty acids and other organics  
368 acids as sole carbon and energy source. Bacteria were enriched in a marine mineral  
369 medium, which contained the following components ( $L^{-1}$ ): 0.02 g  $Na_2SO_4$ , 1.00 g  
370  $KH_2PO_4$ , 0.10 g  $NH_4Cl$ , 20.00 g  $NaCl$ , 3.00 g  $MgCl_2 \cdot 6H_2O$ , 0.50 g  $KCl$ , 0.15 g  
371  $CaCl_2 \cdot 2H_2O$ , 0.70 g  $NaNO_3$ , and 0.50 ml 0.20% resazurin (43). The medium is hereafter  
372 referred to as growth medium. After autoclaving in a dispenser, 1 L of growth medium  
373 was added 5 ml vitamin solution and 20 ml 1 M  $NaHCO_3$  to adjust the pH to 6.80-7.20.  
374 Finally, pyruvate was added as the carbon source from a sterile stock solution to achieve  
375 final nutrient concentrations of 20 mM (2.0 N), 10 mM (1.0 N), 5 mM (0.5 N), and 1 mM  
376 (0.1 N), respectively. The final nutrient medium was stored at 4°C.

377 **Experimental setup.** The experimental apparatus is illustrated in **Fig. 1**. A T-junction  
378 microfluidic device (Micronit, Netherland) consists of a single straight channel and a side  
379 channel with the sizes of 100  $\mu m$  width and 20  $\mu m$  depth and the nuzzle size at the cross-

380 section as narrow as 10  $\mu\text{m}$  (**Fig. S1**). Two syringe pumps (NE-1000 Series of Syringe  
381 Pumps, accuracy  $\pm 1\%$ ) were used to load the bacterial inoculation solution and nutrients  
382 solution separately into the microchannels. The light source is a cold halogen lamp with  
383 24v, 150w placed under the microchip for better illumination. The micromodel was then  
384 placed under a microscope with a digital camera (VisiCam 5.0, VWR) to acquire image  
385 sequences. Measurements and experiments were conducted at room temperature and  
386 pressure.

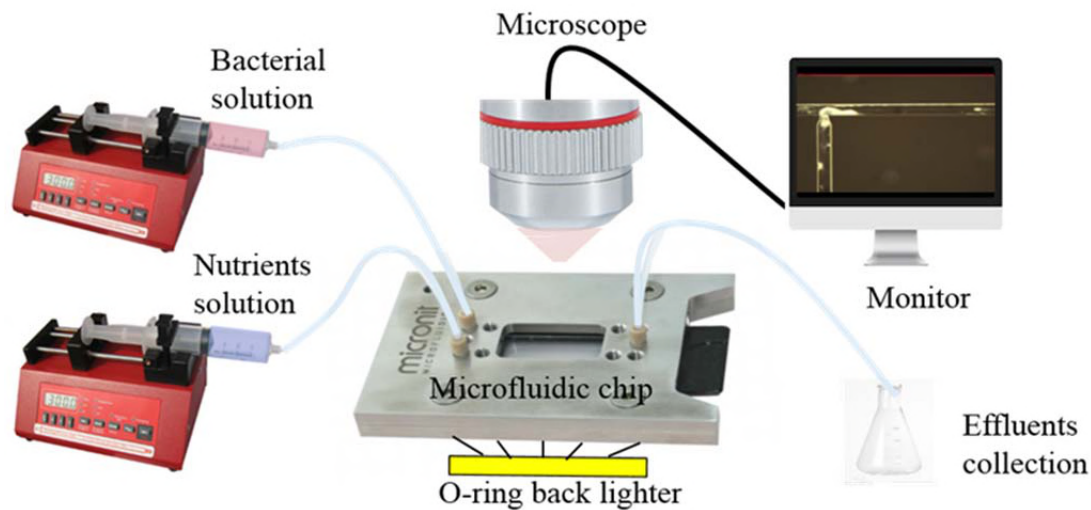

387

388 **FIG 1.** Schematic illustration of the experimental setup.

389 **Inoculation process.** Before inoculation, the microchannel was cleaned using ethyl  
390 alcohol, deionized water,  $\text{H}_2\text{O}_2$  solution (10 wt%) and deionized water to guarantee the  
391 same surface condition for each experiment. The bacterial inocula were pre-cultured in  
392 the growth medium containing 10 mM (1.0 N) nutrients at 30  $^\circ\text{C}$  for 24 h. Inoculation  
393 was achieved by injecting the pre-culture bacterial solution from the bacterial inlet port  
394 (**Fig. S1 (a)**) into the side channel at the rate of 1.0  $\mu\text{l}/\text{min}$  for 24 h, followed by a 24 h  
395 shut-in period. In case of biofilm clogging the straight channel for nutrients injection, we

396 separated the bacterial injection channel (Channel 2) and nutrients flowing channel  
397 (Channel 1) and closed the nutrient inlet during inoculation to force bacterial solution to  
398 only flow towards the outlet direction. Then only nutrients with various pyruvate  
399 concentrations (from 0.1 N to 2.0 N) were injected from the nutrients flow channel  
400 (Channel 1) at constant flowrates from 0.2 to 0.5  $\mu\text{l}/\text{min}$  for approximately 6-7 days,  
401 while Channel 2 was closed, which led to a greater growing of bacteria on the substrates  
402 of the intersection of straight channel and side channel. Before the next experiment,  
403 microchannels were rinsed with ethyl alcohol, water,  $\text{H}_2\text{O}_2$  solution and water separately,  
404 finally, filled with the marine medium without nutrients until the onset of the next  
405 experiment.

406 **Image process.** Image sequences on biofilm growth were acquired with a Leica  
407 microscope fitted with a digital camera for scoring with time. The main area of interest in  
408 this study is the intersection of straight channel and side channel, thereby two areas of  
409 interest (AOIs) with  $0.5\text{mm} \times 0.1\text{mm}$  are extracted from the origin image for further image  
410 analysis (**Figure S1 (b)**). The image processing was performed using MATLAB®'s  
411 Image Processing Toolbox. Biofilm accumulation, here presented by biofilm coverage  
412 ( $A_{\text{nt}}$ ) in areas of interest, was periodically measured in a flowing channel (Channel 1) and  
413 no-flowing channel (Channel 2). Further details on image process can be found in  
414 Support Information S1.

415 **Effluent PCR analysis.** Fluid samples were collected daily at the outlet through a  
416 quantitative real-time PCR (qPCR) on whole-cells to determine the total number of  
417 bacteria. A 20  $\mu\text{l}$  qPCR reaction mix containing 10  $\mu\text{l}$  SYBR® Green PCR kit, 0.06  $\mu\text{l}$   
418 primers (100 $\mu\text{M}$ ), 8.88  $\mu\text{l}$  nuclease free water and 1  $\mu\text{l}$  template was made. The reaction

419 was run by the following cycling conditions: denaturation of DNA at 95°C for 15  
420 minutes, 36 cycles with denaturation for 30 seconds at 94°C, annealing for 30 seconds at  
421 55°C, extension for 1 minute at 72°C followed by a plate read. At the end, a melting  
422 curve from 55°C to 95°C was conducted. The reactions were carried out in a CFX  
423 connect™ real time PCR detection system (BioRad).

#### 424 **ACKNOWLEDGMENTS**

425 We wish to thank Edin Alagic, Rikke H. Ulvøen and Tove L. Eide for technical  
426 assistance. This work was supported by the Research Council of Norway and industry  
427 partner GOE-IP through the projects IMMENS no. 255426.

#### 428 **REFERENCES**

- 429 1. Karambeigi MS, Schaffie M, Fazaelpoor MH, Saadat M. 2009. Micromodel  
430 Studies of Bioplugging Efficiency in Heterogeneous Porous Media by Means of  
431 Mixed Culture of Microorganisms, Abstr 1st International Petroleum Conference  
432 and Exhibition Shiraz 2009, Shiraz, Iran.
- 433 2. Karambeigi MS, Schaffie M, Fazaelpoor MH. 2013. Improvement of Water  
434 Flooding Efficiency Using Mixed Culture of Microorganisms in Heterogeneous  
435 Micro-models. *Pet. Sci. Technol.* 31:923-931.
- 436 3. Peszynska M, Trykozko A, Iltis G, Schlueter S, Wildenschild D. 2016. Biofilm  
437 growth in porous media: Experiments, computational modeling at the porescale,  
438 and upscaling. *Adv. Water Resour.* 95:288-301.
- 439 4. Dumitrache A, Wolfaardt G, Allen G, Liss SN, Lynd LR. 2013. Form and  
440 function of *Clostridium thermocellum* biofilms. *Appl. Environ. Microbiol.*  
441 79:231-9.



- 442 5. Vilcáez J, Li L, Wu D, Hubbard SS. 2013. Reactive Transport Modeling of  
443 Induced Selective Plugging by *Leuconostoc Mesenteroides* in Carbonate  
444 Formations. *Geomicrobiol. J.* 30:813-828.
- 445 6. Joshi S, Goyal S, Mukherjee A, Reddy MS. 2017. Microbial healing of cracks in  
446 concrete: a review. *J. Ind. Microbiol. Biotechnol.* 44:1511-1525.
- 447 7. Oka GK, Pinder GF. 2017. Multiscale Model for Assessing Effect of Bacterial  
448 Growth on Intrinsic Permeability of Soil: Model Description. *Transp. Porous  
449 Media* 119:267-284.
- 450 8. Alhede M, Qvortrup K, Liebrechts R, Hoiby N, Givskov M, Bjarnsholt T. 2012.  
451 Combination of microscopic techniques reveals a comprehensive visual  
452 impression of biofilm structure and composition. *FEMS Immunol. Med.  
453 Microbiol.* 65:335-42.
- 454 9. Manuel CM, Nunes OC, Melo LF. 2007. Dynamics of drinking water biofilm in  
455 flow/non-flow conditions. *Water Res.* 41:551-62.
- 456 10. Brovelli A, Malaguerra F, Barry DA. 2009. Bioclogging in porous media: Model  
457 development and sensitivity to initial conditions. *Environmental Modelling &  
458 Software* 24:611-626.
- 459 11. Karimi M, Mahmoodi M, Niazi A, Al-Wahaibi Y, Ayatollahi S. 2012.  
460 Investigating wettability alteration during MEOR process, a micro/macro scale  
461 analysis. *Colloids Surf., B* 95:129-36.
- 462 12. Khajepour H, Mahmoodi M, Biria D, Ayatollahi S. 2014. Investigation of  
463 wettability alteration through relative permeability measurement during MEOR  
464 process: A micromodel study. *J. Pet. Sci. Eng.* 120:10-17.

- 465 13. Hosseininoosheri P, Lashgari HR, Sepehrnoori K. 2016. A novel method to model  
466 and characterize in-situ bio-surfactant production in microbial enhanced oil  
467 recovery. *Fuel* 183:501-511.
- 468 14. Rabiei A, Sharifinik M, Niazi A, Hashemi A, Ayatollahi S. 2013. Core flooding  
469 tests to investigate the effects of IFT reduction and wettability alteration on oil  
470 recovery during MEOR process in an Iranian oil reservoir. *Appl. Microbiol.*  
471 *Biotechnol.* 97:5979-91.
- 472 15. Sarafzadeh P, Niazi A, Oboodi V, Ravanbakhsh M, Hezave AZ, Ayatollahi SS,  
473 Raeissi S. 2014. Investigating the efficiency of MEOR processes using  
474 *Enterobacter cloacae* and *Bacillus stearothermophilus* SUCPM#14 (biosurfactant-  
475 producing strains) in carbonated reservoirs. *J. Pet. Sci. Eng.* 113:46-53.
- 476 16. Brown LR. 2010. Microbial enhanced oil recovery (MEOR). *Curr. Opin.*  
477 *Microbiol.* 13:316-20.
- 478 17. Suthar H, Krushi Hingurao, Anjana Desai, Nerurkar aA. 2009. Selective Plugging  
479 Strategy Based Microbial Enhanced Oil Recovery Using *Bacillus licheniformis*  
480 TT33. *J. Microbiol. Biotechnol.* 19:8.
- 481 18. Klueglein N, Kögler F, Adaktylou IJ, Wuestner ML, Mahler E, Scholz J, Herold  
482 A, Alkan H. 2016. Understanding Selective Plugging and Biofilm Formation of a  
483 Halophilic Bacterial Community for MEOR Application. *Soc. Pet. Eng. J. SPE-*  
484 *179620-MS.*
- 485 19. Tsai YP. 2005. Impact of flow velocity on the dynamic behaviour of biofilm  
486 bacteria. *Biofouling* 21:267-77.

- 487 20. Rozen R, Bachrach G, Zachs B, Steinberg D. 2001. Growth rate and biofilm  
488 thickness of *Streptococcus sobrinus* and *Streptococcus mutans* on hydroxapatite.  
489 *APMIS* 109:6.
- 490 21. P. Stoodley ID, J.D.Boyle and H.M. Lappin-Scott. 1999. Influence of  
491 hydrodynamics and nutrients on biofilm structure. *J. Appl. Microbiol.* 85:7.
- 492 22. Flemming H-C, Wingender J, Szewzyk U. 2011. *Biofilm highlights, vol 5,*  
493 *Heidelberg, USA.*
- 494 23. Abdel Aal GZ, Atekwana EA, Atekwana EA. 2010. Effect of bioclogging in  
495 porous media on complex conductivity signatures. *J. Geophys. Res.* 115.
- 496 24. Cuzman OA, Rescic S, Richter K, Wittig L, Tiano P. 2015. *Sporosarcina pasteurii*  
497 use in extreme alkaline conditions for recycling solid industrial wastes. *J.*  
498 *Biotechnol.* 214:49-56.
- 499 25. Guimera X, Moya A, Dorado AD, Villa R, Gabriel D, Gabriel G, Gamisans X.  
500 2015. Biofilm dynamics characterization using a novel DO-MEA sensor: mass  
501 transport and biokinetics. *Appl. Microbiol. Biotechnol.* 99:55-66.
- 502 26. Lee JH, Kaplan JB, Lee WY. 2008. Microfluidic devices for studying growth and  
503 detachment of *Staphylococcus epidermidis* biofilms. *Biomed. Microdevices*  
504 10:489-98.
- 505 27. Weiss N, Obied KE, Kalkman J, Lammertink RG, van Leeuwen TG. 2016.  
506 Measurement of biofilm growth and local hydrodynamics using optical coherence  
507 tomography. *Biomed. Opt. Express* 7:3508-3518.

- 508 28. Hunt SM, Werner EM, Huang B, Hamilton MA, Stewart PS. 2004. Hypothesis for  
509 the role of nutrient starvation in biofilm detachment. *Appl. Environ. Microbiol.*  
510 70:7418-25.
- 511 29. Rochex A, Lebeault JM. 2007. Effects of nutrients on biofilm formation and  
512 detachment of a *Pseudomonas putida* strain isolated from a paper machine. *Water*  
513 *Res.* 41:2885-92.
- 514 30. Cherifi T, Jacques M, Quessy S, Fravallo P. 2017. Impact of Nutrient Restriction  
515 on the Structure of *Listeria monocytogenes* Biofilm Grown in a Microfluidic  
516 System. *Front Microbiol.* 8:864.
- 517 31. Rukavina Z, Vanic Z. 2016. Current Trends in Development of Liposomes for  
518 Targeting Bacterial Biofilms. *Pharmaceutics* 8.
- 519 32. Skolimowski M, Nielsen MW, Emneus J, Molin S, Taboryski R, Sternberg C,  
520 Dufva M, Geschke O. 2010. Microfluidic dissolved oxygen gradient generator  
521 biochip as a useful tool in bacterial biofilm studies. *Lab Chip* 10:2162-9.
- 522 33. Tahirbegi IB, Ehgartner J, Sulzer P, Zieger S, Kasjanow A, Paradiso M, Strobl M,  
523 Bouwes D, Mayr T. 2017. Fast pesticide detection inside microfluidic device with  
524 integrated optical pH, oxygen sensors and algal fluorescence. *Biosens.*  
525 *Bioelectron.* 88:188-195.
- 526 34. Raudales RE, Parke JL, Guy CL, Fisher PR. 2014. Control of waterborne  
527 microbes in irrigation: A review. *Agric. Water Manag.* 143:9-28.
- 528 35. Lam RH, Cui X, Guo W, Thorsen T. 2016. High-throughput dental biofilm  
529 growth analysis for multiparametric microenvironmental biochemical conditions  
530 using microfluidics. *Lab Chip* 16:1652-62.

- 531 36. Sekar R, Nair KVK, Rao VNR, Venugopalan VP. 2002. Nutrient dynamics and  
532 successional changes in a lentic freshwater biofilm. *Freshwater Biol.* 47:14.
- 533 37. Bester E, Wolfaardt G, Joubert L, Garny K, Saftic S. 2005. Planktonic-cell yield  
534 of a pseudomonad biofilm. *Appl. Environ. Microbiol.* 71:7792-8.
- 535 38. Kirby BJ. 2010. *Passive Scalar Transport: Dispersion, Patterning, and Mixing,*  
536 *Micro- and Nanoscale Fluid Mechanics: Transport in Microfluidic Devices*  
537 doi:<https://doi.org/10.1017/CBO9780511760723.006>. Cambridge University  
538 Press, New York.
- 539 39. Gjermansen M, Nilsson M, Yang L, Tolker-Nielsen T. 2010. Characterization of  
540 starvation-induced dispersion in *Pseudomonas putida* biofilms: genetic elements  
541 and molecular mechanisms. *Mol. Microbiol.* 75:815-26.
- 542 40. Chua SL, Liu Y, Yam JKH, Chen Y, Vejborg RM, Tan BGC, Kjelleberg S,  
543 Tolker-Nielsen T, Givskov M, Yang L. 2014. Dispersed cells represent a distinct  
544 stage in the transition from bacterial biofilm to planktonic lifestyles. *Nat.*  
545 *Commun.* 5.
- 546 41. Ohashi A, Harada H. 1994. Adhesion strength of biofilm developed in an  
547 attached-growth reactor. *Water Sci. Technol.* 29:8.
- 548 42. Billings N, Birjiniuk A, Samad TS, Doyle PS, Ribbeck K. 2015. Material  
549 properties of biofilms-a review of methods for understanding permeability and  
550 mechanics. *Rep. Prog. Phys.* 78:036601.
- 551 43. Myhr S, Lillebo BL, Sunde E, Beeder J, Torsvik T. 2002. Inhibition of microbial  
552 H<sub>2</sub>S production in an oil reservoir model column by nitrate injection. *Appl.*  
553 *Microbiol. Biotechnol.* 58:400-8.
